# Supplementary material for: 12.88% efficiency in doctor-blade coated organic solar cells through optimizing the surface morphology of a ZnO cathode buffer layer
Source: Royal Society of Chemistry journal article supplement (doi:10.1039/c8ta08873j), 2018-12-04
Supplement: c8ta08873j1.pdf [file c8ta08873j1.pdf]

## Electronic Supplementary Information

### 12.88% Efficiency in Doctor-Blade Coated Organic Solar Cells through Optimizing the Surface Morphology of a ZnO Cathode Buffer Layer

Guoqi Ji,<sup>a,d</sup> Wenchao Zhao,<sup>c</sup> Junfeng Wei,<sup>a</sup> Linpeng Yan,<sup>a</sup> Yunfei Han,<sup>a</sup> Qun Luo,<sup>a,b,e\*</sup>  
Shangfeng Yang,<sup>d</sup> Jianhui Hou,<sup>c\*</sup> Chang-Qi Ma<sup>a,b\*</sup>

<sup>a</sup> Suzhou Institute of Nano-Tech and Nano-Bionics, Printable Electronics Research Center (SINANO), Chinese Academy of Sciences, Collaborative Innovation Center of Suzhou Nano Science and Technology, Suzhou, Jiangsu 215123, P. R. China.

<sup>b</sup> College of Nano-Tech and Nano-Bionics, University of Science and Technology of China, Hefei, 230027. P. R. China.

<sup>c</sup> Institute of Chemistry, Chinese Academy of Sciences, Beijing, 100190, P. R. China

<sup>d</sup> Nano Science and Technology Institute, University of Science and Technology of China, 166 Ren Ai Road, SEID SIP, Suzhou, Jiangsu 215123, P. R. China

<sup>e</sup> State Key Lab of Silicon Materials, Zhejiang Univeristy, Hangzhou, 310027, P. R. China

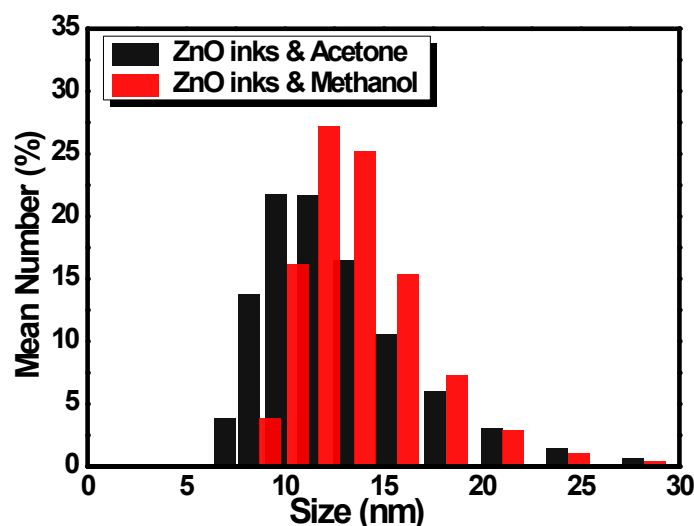

**Figure S1.** Particle diameter of ZnO dispersed in acetone and methanol with concentration of 10 mg/mL that recorded by the dynamic light scattering measurement (DLS).

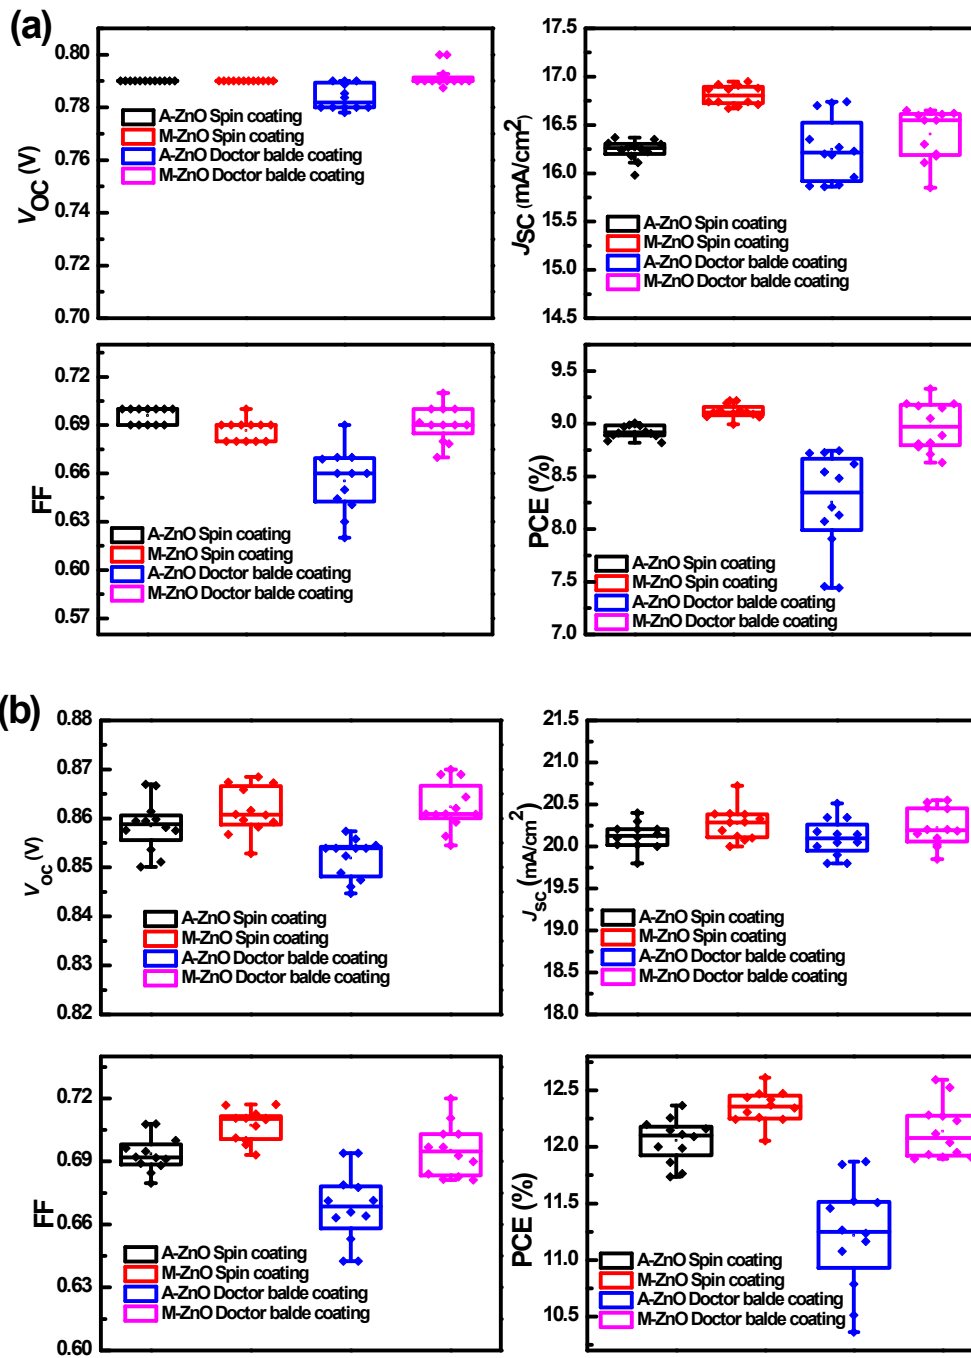

**Figure S2.** Performance distribution of the (a) PTB7-Th:PC<sub>71</sub>BM and (b) PBDB-TF:IT-4F devices fabricated through spin-coating and doctor-blade coating.

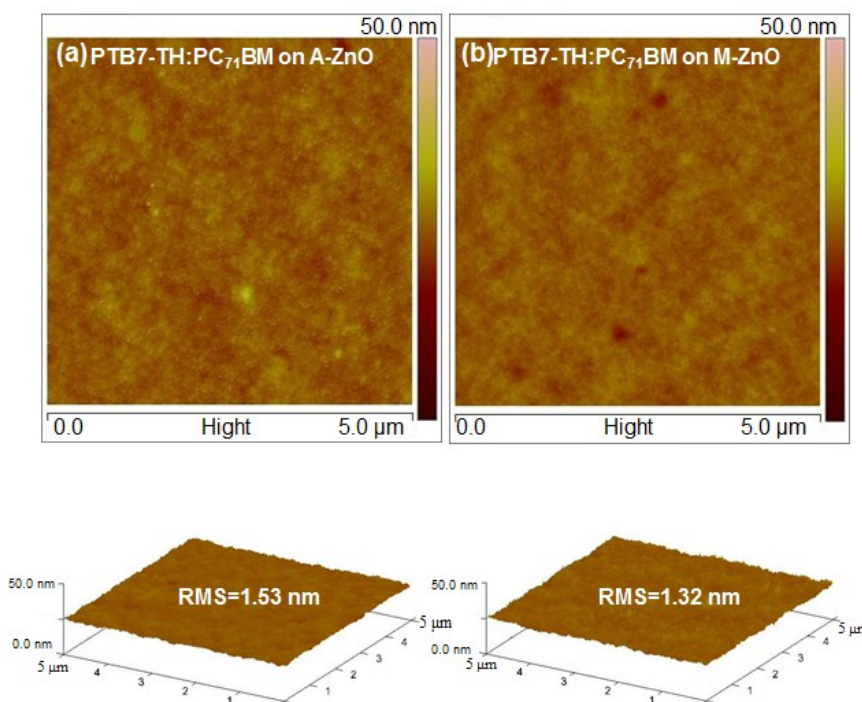

**Figure S3.** AFM images of the doctor blade coated photoactive layers on the top of A-ZnO and M-ZnO CBLs.

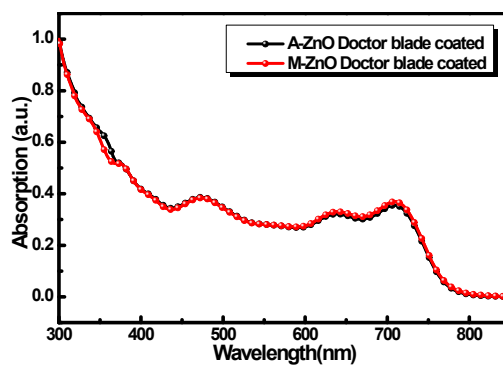

**Figure S4.** Absorption spectra of the doctor-blade coated PTB7-Th:PC<sub>71</sub>BM on the top of A-ZnO and M-ZnO layers.

**Table S1.** Fitting parameters of the electrochemical impedance spectra of the spin-coated and doctor blade coated cells.

| Device    | $R_s$ ( $\Omega\text{cm}^2$ ) | $R_1$ ( $\Omega\text{cm}^2$ ) | $R_2$ ( $\Omega\text{cm}^2$ ) |
|-----------|-------------------------------|-------------------------------|-------------------------------|
| A-ZnO SC  | 15.3                          | 43.6                          | 35.8                          |
| M-ZnO SC  | 13.6                          | 43.1                          | 32.1                          |
| A-ZnO DBC | 16.8                          | 43.4                          | 130.1                         |
| M-ZnO DBC | 14.3                          | 43.2                          | 92.5                          |

**Table S2** Device performance of the A-ZnO SC, M-ZnO SC, A-ZnO DBC, M-ZnO DBC cells that used for LBIC mapping.

| Entry | Process | ZnO   | $V_{oc}$<br>(V) | $J_{sc}$<br>(mA/cm <sup>2</sup> ) | FF<br>(%) | PCE<br>(%) |
|-------|---------|-------|-----------------|-----------------------------------|-----------|------------|
| 9     | SC      | A-ZnO | 0.85            | 20.25                             | 71        | 12.22      |
| 10    | SC      | M-ZnO | 0.85            | 20.68                             | 72        | 12.75      |
| 11    | DBC     | A-ZnO | 0.86            | 20.06                             | 68        | 11.73      |
| 12    | DBC     | M-ZnO | 0.85            | 20.55                             | 71        | 12.40      |

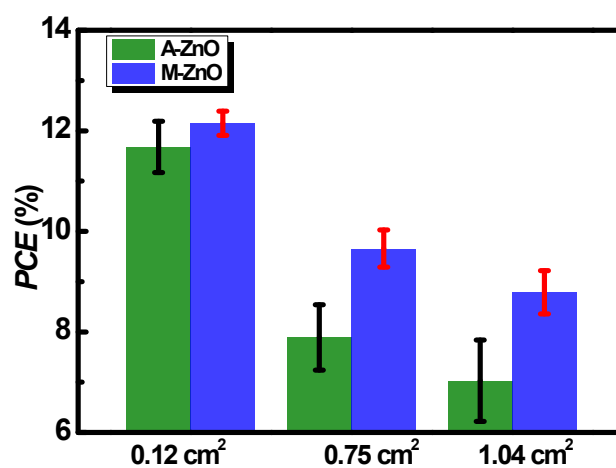

**Figure S5.** The device performance of the doctor-blade coated solar cells for the 0.12, 0.75 and 1.04 cm<sup>2</sup>.

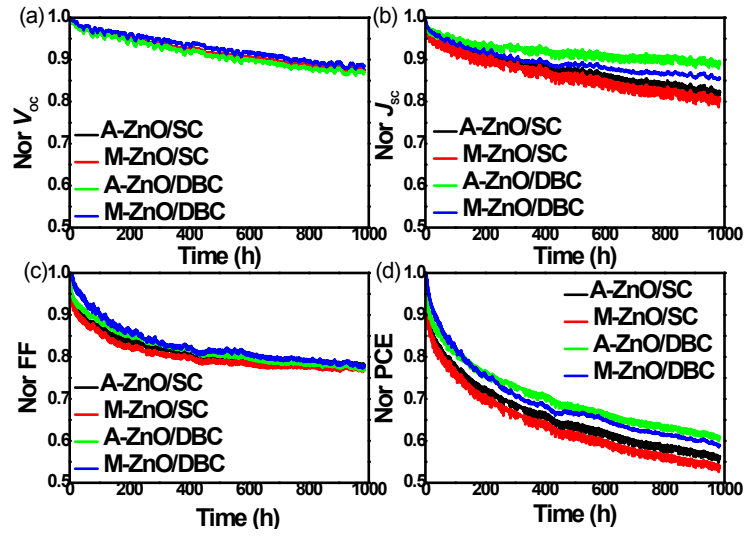

**Figure S6.** Normalized (a)  $V_{oc}$ , (b)  $J_{sc}$ , (c) FF, and (d) PCE decay of the spin- and DB-coated

PTB7-Th:PC<sub>71</sub>BM inverted solar cells.
